# Supplementary material for: Effects of simulated acid rain on hydrochemical factors and microbial community structure in red soil aquifers
Source: Royal Society of Chemistry journal article supplement (doi:10.1039/d3ra08820k), 2024-01-01
Supplement: d3ra08820k1.pdf [file d3ra08820k1.pdf]

## *Supplementary Material*

### **Effects of simulated acid rain on hydrochemical factors and microbial community structure in red soil aquifers**

**Yian Wang<sup>1†</sup>, Chao Long<sup>2†</sup>, Li Yin<sup>1</sup>, Renlu Liu<sup>1</sup>, Yonghui Liao<sup>1</sup>, Genhe He<sup>1\*</sup>, Zuwen Liu<sup>1,2,3</sup>**

<sup>1</sup>School of Life Science, Jinggangshan University, Ji'an, Jiangxi, China

<sup>2</sup>School of Civil and Surveying & Mapping Engineering, Jiangxi University of Science and Technology, Ganzhou, Jiangxi, China

<sup>3</sup>School of Hydraulic & Ecological Engineering, Nanchang Institute of Technology, Nanchang, China

†These authors (Yian Wang, [nickowya@163.com](mailto:nickowya@163.com); Chao Long, [lc18832058300@163.com](mailto:lc18832058300@163.com)) contributed equally to this work and share first authorship.

\* **Correspondence:** Genhe He ([hegenhe@jgsu.edu.cn](mailto:hegenhe@jgsu.edu.cn))

## Tables

**Table S1. The alpha diversity of microbial community in 12 soil columns simulated acid rain leaching.**

| <b>pH</b>  | <b>Diameter grade</b> | <b>ID</b>   | <b>Reads</b> | <b>OUT</b> | <b>Sobs</b> | <b>Shannon</b> | <b>Simpson</b> | <b>Ace</b> | <b>Chao</b> | <b>Coverage</b> |
|------------|-----------------------|-------------|--------------|------------|-------------|----------------|----------------|------------|-------------|-----------------|
| <b>7.0</b> | <b>Fine</b>           | <b>F7</b>   | 54111        | 707        | 699.        | 3.307          | 0.147          | 880.59     | 879.98      | 0.995           |
|            | <b>Medium</b>         | <b>M7</b>   | 68337        | 730        | 654         | 3.829          | 0.069          | 869.12     | 885.41      | 0.995           |
|            | <b>Coarse</b>         | <b>C7</b>   | 73054        | 878        | 786         | 4.137          | 0.090          | 1040.4     | 1047.35     | 0.995           |
| <b>5.5</b> | <b>Fine</b>           | <b>F5.5</b> | 67213        | 778        | 707         | 3.897          | 0.049          | 1079.09    | 1011.45     | 0.994           |
|            | <b>Medium</b>         | <b>M5.5</b> | 66332        | 741        | 679.5       | 3.606          | 0.087          | 1053.28    | 975.117     | 0.995           |
|            | <b>Coarse</b>         | <b>C5.5</b> | 59293        | 676        | 626.5       | 2.867          | 0.212          | 1103.93    | 947.59      | 0.994           |
| <b>4.5</b> | <b>Fine</b>           | <b>F4.5</b> | 52234        | 549        | 535         | 2.755          | 0.224          | 711.66     | 714.31      | 0.996           |
|            | <b>Medium</b>         | <b>M4.5</b> | 72347        | 523        | 469         | 2.766          | 0.202          | 598.12     | 590.09      | 0.997           |
|            | <b>Coarse</b>         | <b>C4.5</b> | 64418        | 830        | 536         | 2.060          | 0.212          | 1059.94    | 714.64      | 0.991           |
| <b>3.5</b> | <b>Fine</b>           | <b>F3.5</b> | 60469        | 870        | 875         | 2.969          | 0.222          | 1064.88    | 1041.81     | 0.995           |
|            | <b>Medium</b>         | <b>M3.5</b> | 62070        | 740        | 684         | 3.018          | 0.219          | 854.26     | 838.72      | 0.996           |
|            | <b>Coarse</b>         | <b>C3.5</b> | 61538        | 708        | 669         | 3.422          | 0.116          | 778.40     | 764.85      | 0.996           |

# Figures

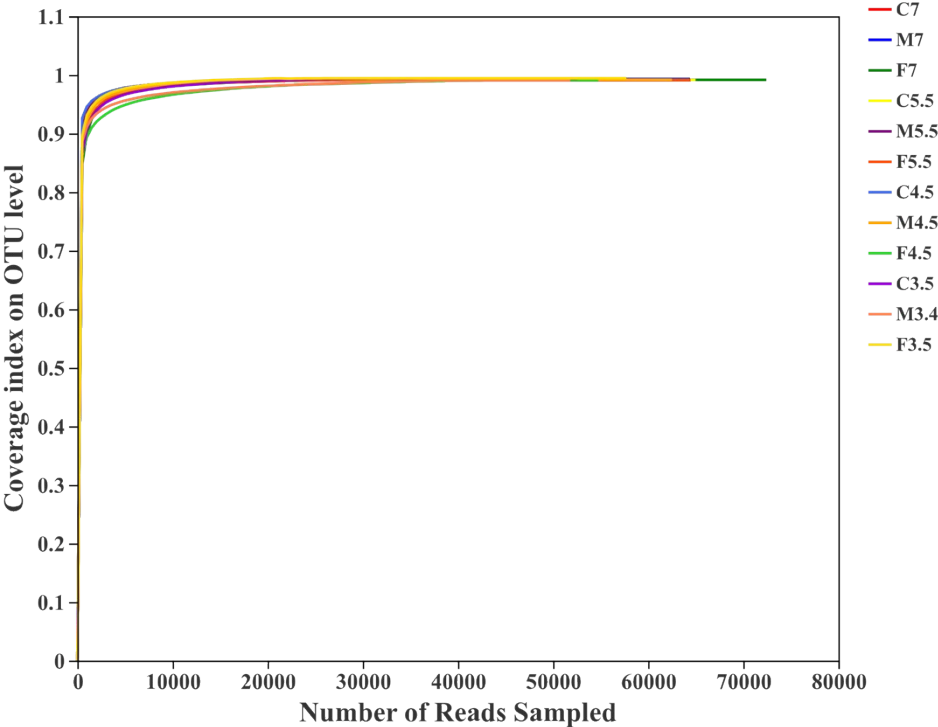

Fig. S1 Coverage rarefaction curves plot.

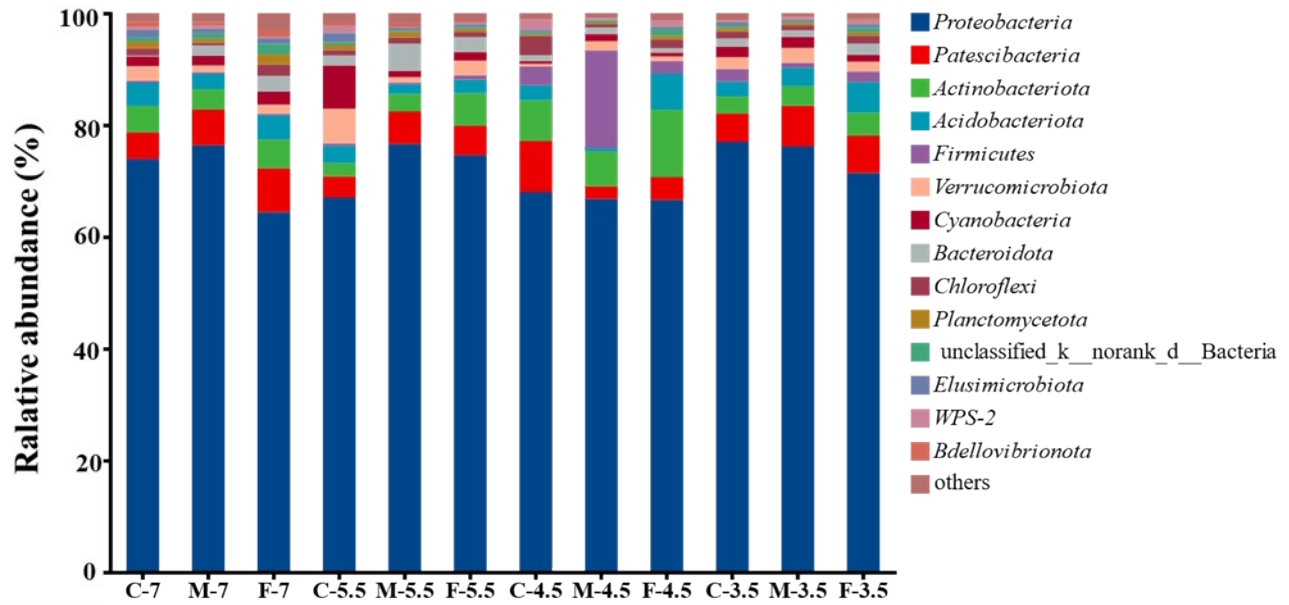

Fig. S2 Relative abundance of the microbial in leachate at the phylum level.

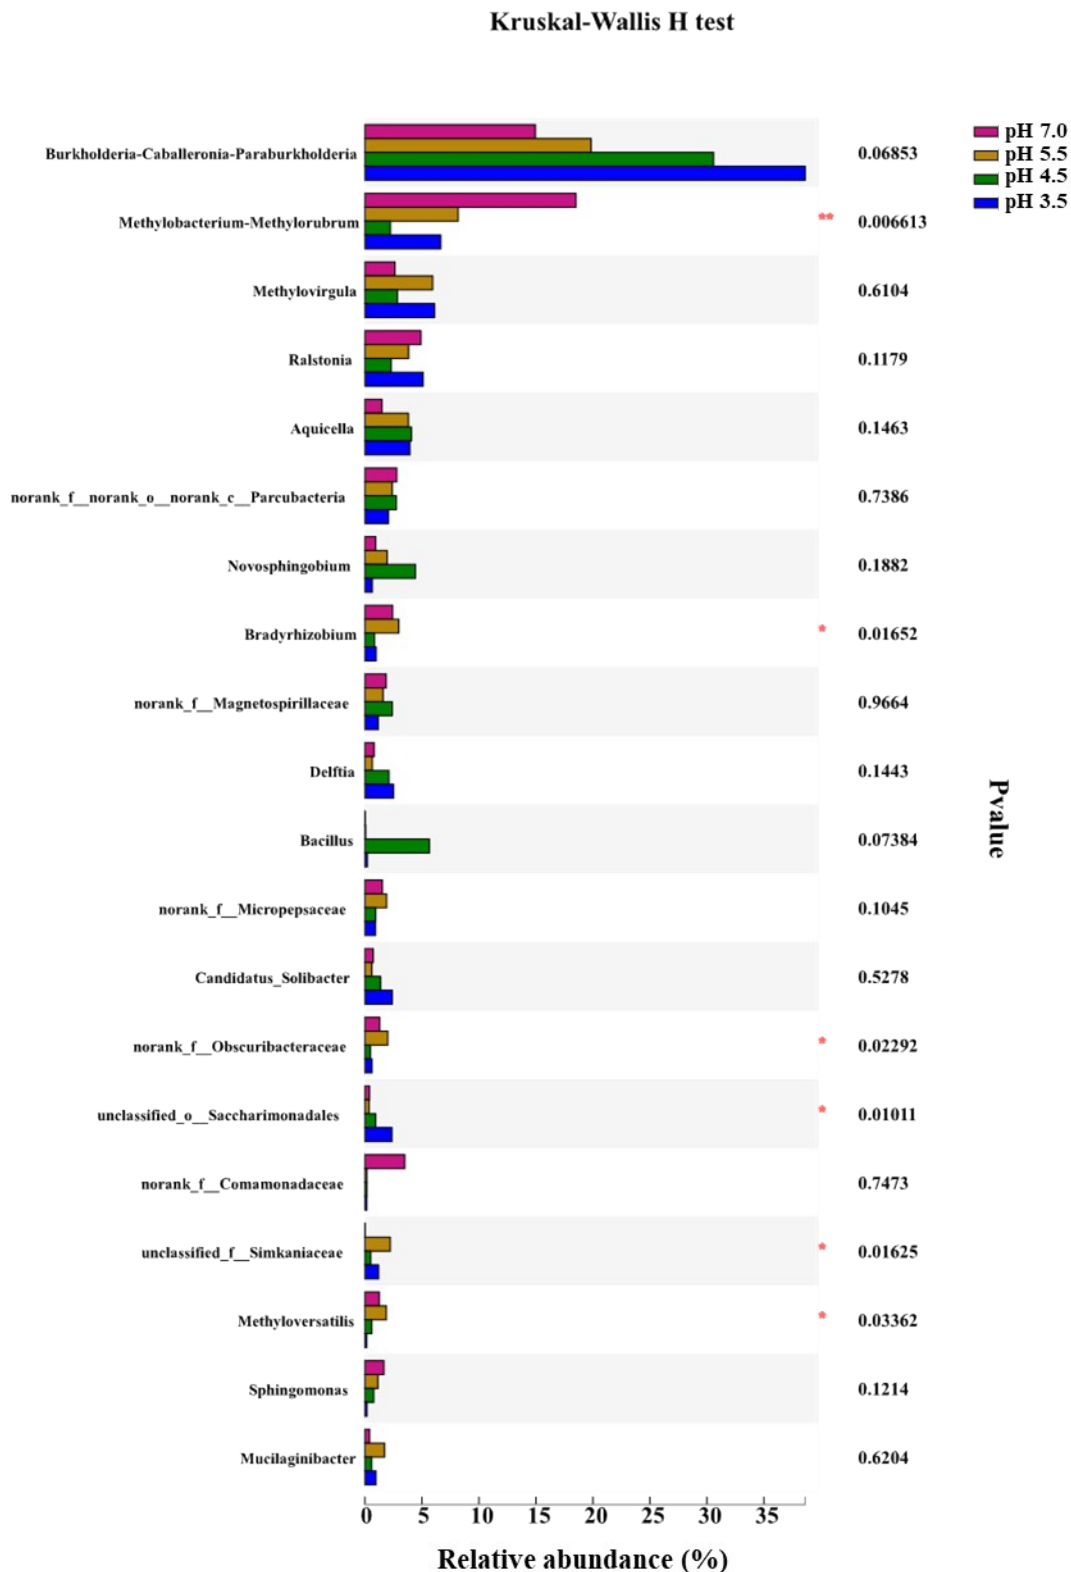

Fig. S3 A Kruskal-Wallis H test of the differences in microbial community composition at the genus level among different pH treatments. (Top 20; \*  $p \leq 0.05$ ; \*\*  $p \leq 0.01$ ).
